# Supplementary material for: Macrophage dysfunction initiates colitis during weaning of infant mice lacking the interleukin-10 receptor
Source: eLife. 2017 Jul 5;6:e27652. doi: 10.7554/eLife.27652 (PMC5531923; doi:10.7554/eLife.27652)
Supplement: Figure 3—source data 3. — DOI: http://dx.doi.org/10.7554/eLife.27652.011 [file elife-27652-fig3-data3.xlsx]

## Sheet: Normalized Counts
	1 Week Het	1 Week KO	3 Week Het	3 Week KO	12 Week Het	12 Week KO
ENSMUSG00000027776	2.97453	10.4844	1	33.4149	9.45572	735.458	Il12a
ENSMUSG00000022584	5.94906	4.49331	9.73405	284.906	143.254	2610.72	Ly6c2
ENSMUSG00000020178	31.7283	41.9376	9.73405	254.129	363.1	2369.38	Adora2a
ENSMUSG00000022586	22.8047	43.4354	38.9362	809.872	105.431	11671.2	Ly6i
ENSMUSG00000054072	65.4396	80.8796	97.3405	1766.59	90.7749	2085.39	Iigp1
ENSMUSG00000041324	118.981	593.117	87.6065	1519.5	433.545	29089.7	Inhba
ENSMUSG00000075602	44.6179	28.4577	138.71	2169.33	908.695	4760.42	Ly6a
ENSMUSG00000029417	134.845	277.088	194.681	2276.61	511.555	7744.27	Cxcl9
ENSMUSG00000004296	221.107	271.097	80.3059	884.616	1224.52	2056.1	Il12b
ENSMUSG00000066363	50.567	148.279	136.277	1406.94	374.919	1386.23	Serpina3f
ENSMUSG00000022126	46.601	121.319	206.849	2108.66	822.648	29911.2	Irg1
ENSMUSG00000060183	47.5925	31.4532	60.8378	455.498	156.965	1462.64	Cxcl11
ENSMUSG00000028270	225.073	185.724	253.085	1473.77	328.114	7353.3	Gbp2
ENSMUSG00000025383	77.3378	269.599	109.508	615.538	1041.08	10457.5	Il23a
ENSMUSG00000020826	1.98302	4.49331	12.1676	67.7092	10.4013	3704.67	Nos2
ENSMUSG00000064246	23.7962	161.759	257.952	1356.82	280.835	19442.2	Chil1
ENSMUSG00000023951	787.259	3089.9	1231.36	5653.28	4665.45	32308.6	Vegfa
ENSMUSG00000027399	8488.31	10108.5	2504.09	10746.4	17825	95237	Il1a
ENSMUSG00000029657	730.743	1342	2287.5	8053.88	21666.4	16319.5	Hsph1
ENSMUSG00000026104	341.079	365.456	340.692	1162.49	309.202	4378.36	Stat1
ENSMUSG00000072596	26.7708	187.221	1078.05	339.425	667.101	84.0523	Ear2
ENSMUSG00000027556	5.94906	14.9777	372.328	62.4332	327.641	99.3345	Car1
ENSMUSG00000047222	1	4.49331	1384.67	182.023	834.468	8.91464	Rnase2a
ENSMUSG00000022969	1220.55	11.9822	939.336	24.6215	1106.79	27.3807	Il10rb
