# Supplementary material for: Macrophage dysfunction initiates colitis during weaning of infant mice lacking the interleukin-10 receptor
Source: eLife. 2017 Jul 5;6:e27652. doi: 10.7554/eLife.27652 (PMC5531923; doi:10.7554/eLife.27652)
Supplement: Figure 8—source data 1. — DOI: http://dx.doi.org/10.7554/eLife.27652.018 [file elife-27652-fig8-data1.xlsx]

## Sheet: Chao1
Genotype	Mouse ID	Collection Day	17	19	21	23	25	28	35	42	49	56	63	70	77	84	91	98
Il10rb+/-	1		4143.17	3113.71	7158.84	5854.57	4822.68	8042.35	6576.31	4759.46	3944.24	6875.32	5537.2	5741.53	8010.08	6743.88	9056.07	7321.29
Il10rb+/-	2		2479.56	2695.61	4775.23	4866.04	4508.42	5420.22	6732.13	6971.11	4628.53	4832.61	6087.31	7019.37	5763.57	5795.02	7855.15	8537.55
Il10rb+/-	9		3240.68	4335.55	6113.67	3687.63	4913.14	5402.36	5585.72	3756.85	4678.23	7405.38	6500.74	6931.12	7218.77	5678.64	6758.57	7812.24
Il10rb+/-	10		2557.09	3012.47	5578.09	7150.99	4167.53	5555.18	5381.89	4813.47	4275.42	7223.29	6492.35	4777.35	6483.58	6813.06	6105.83	8528.76
Il10rb+/-	12		4416.25	5820.67	6618.25	5496.4	5908.18	4815.9	8826.74	5261.93	4660.47	7775.45	6640.23	7043.15	5037.25	5684.62	5678.82	6761.48
Il10rb+/-	19		3935.88	3041.05	5172.02	5584.99	6097.62	4092.23	6886.39	6850.46	7441.63	6972.45	7404.39	3784.08	7683.15	6684.44	6573.48	7787.49
Il10rb+/-	20		5203.26	7308.62	6317.62	4893.54	7325.9	6430.63	4712.41	4322.78	5437.8	6536.45	7786.63	5307.43	6584.23	6767.56	8049.78	5509.31
Il10rb+/-	21		4910.45	3259.19	5075.78	6143.88	6241.75	5328.69	6282.94	4833.39	6703.56	6757.97	4537.77	7045.07	7151.48	6827.27	7987.3	6723.04
Il10rb+/-	30		5555.1	6456.86	6507.1	5205.81	7094.26	5013.52	5122.11	6904.25	4990	7041.07	7346.08	5206.44	5191.19	7841.21	8330.17	6504.71
Il10rb+/-	3					5442.92	5259.14	5402.97	7056.1	5993.54	7573.78	7634.97	4323.14	5528.55	9765.02	7085.8	5726.17	6066.08
		Control	4049.05	4338.19	5924.07	5432.68	5633.86	5550.4	6316.27	5446.72	5433.36	6905.5	6265.58	5838.41	6888.83	6592.15	7212.14	7155.2
		Std Dev Control	1109.14	1743.26	811.017	905.059	1074.46	1056.64	1193.58	1160.47	1324.9	824.514	1171.22	1136.71	1420.96	688.296	1190.83	1017.44
Il10rb-/-	4		3239.2	3942.14	5858	4828.86	4514.91	3433.07	6932.53	5000.36	6617.4	5845.53	6879.37	4960.34	7406.28	6610.86	5853.67	5562.33
Il10rb-/-	5		3934.8	3065.65	6855.94	7297.16	4241.8	6001.97	7194.13	3463.49	6001.8	7519.26	6404.22	7816.29	6831.52	6238.8	8212.3	8258.6
Il10rb-/-	13		2530.07	2507.27	5278.43	4286.36	6336.03	3786.51	5054.45	7629.78	5086.34	7487.8	5669.93	7061.65	6508.17	5742.16	5882.26	5580.42
Il10rb-/-	15		3217.9	3260.19	7209.51	4191.14	5368.37	5555.82	4499.46	5313.01	6824.1	8798.11	6734.06	4972.35	5856.11	4346.41	5078.9	5175.67
Il10rb-/-	17		4873.59	6540.22	6382.38	4769.83	4778.54	5923.74	6229.68	5372.94	6000.55	6100.69	6492.06	6704.13	6499.85	6231.27	6165.75	6133.45
Il10rb-/-	18		4669.52	3840.63	7801.31	4727.89	6029.56	3986.21	4702.52	3931.8	4380	6831.03	5001.78	3717.86	6248.24	5342.9	5063.27	5446.34
Il10rb-/-	23		6572.72	7036.63	6623.99	6188.25	5270.65	4654.34	5457.03	5394.97	6579.55	7799.42	6388.81	5589.95	7438.76	7123.89	8359.99	7137.92
Il10rb-/-	27		5213.85	3451.18	6994.51	7611.09	7130.93	7828.08	5368.05	5723.34	6480.44	9049.37	5778.36	4673.27	8645.35	7123.34	7473.48	6887.7
Il10rb-/-	29		6500.64	5272.78	6948.21	5698.18	4200.87	3946.12	6314.68	6307.48	6917.68	5538.65	3166.29	4877.79	4489.48	4701.31	5335.88	5594.44
Il10rb-/-	31		5752.95	5167.2	8094.32	6113.19	5253.75	5217.92	6504.64	6467.37	4317.5	7529.84	6788.36	6610.6	6677.04	6868.51	4998.3	6171.98
Il10rb-/-	8				6264.74	5896.55	4559.26	5712.23	4248.91	6770.11	6658.5	5304.08	5136.5	6567.48	6666.16	5311.27	5286.12	5195.73
Il10rb-/-	14				5903.57	3815.44	4612.67	3050.44	7001.24	4712.43	7629.8	8244.9	6170.58	6889.27	6632.53	5113.86	7756.86	7941.91
		KO	4650.52	4408.39	6684.58	5451.99	5191.45	4924.7	5792.28	5507.26	6124.47	7170.72	5884.19	5870.08	6658.29	5896.21	6288.9	6257.21
		Std Dev KO	1404.49	1526.32	811.657	1217.62	907.617	1369.72	1034.69	1180.33	1029.7	1251.99	1056.95	1233.54	986.782	944.485	1295.54	1060.6
			17	19	21	23	25	28	35	42	49	56	63	70	77	84	91	98
		Control	4049.05	4338.19	5924.07	5432.68	5633.86	5550.4	6316.27	5446.72	5433.36	6905.5	6265.58	5838.41	6888.83	6592.15	7212.14	7155.2
		Std Dev Control	1109.14	1743.26	811.017	905.059	1074.46	1056.64	1193.58	1160.47	1324.9	824.514	1171.22	1136.71	1420.96	688.296	1190.83	1017.44
		KO	4650.52	4408.39	6684.58	5451.99	5191.45	4924.7	5792.28	5507.26	6124.47	7170.72	5884.19	5870.08	6658.29	5896.21	6288.9	6257.21
		Std Dev KO	1404.49	1526.32	811.657	1217.62	907.617	1369.72	1034.69	1180.33	1029.7	1251.99	1056.95	1233.54	986.782	944.485	1295.54	1060.6

## Sheet: OTU007 (H ganmani)
Genotype	Mouse ID	Collection Day	17	19	21	23	25	28	35	42	49	56	63	70	77	84	91	98
Il10rb+/-	1		6.8007e-05	4.10338e-05	0.000114793	0.15493	0.0668498	0.0810877	0.171229	0.273518	0.0926002	0.157648	0.120531	0.192094	0.0392037	0.0426026	0.0635414	0.217859
Il10rb+/-	2		6.15621e-05	0.000124806	0.000212555	0.0784707	0.10347	0.017667	0.161774	0.0177338	0.0487895	0.0548605	0.0999143	0.103869	0.130275	0.250235	0.046914	0.172601
Il10rb+/-	9		7.88768e-05	5.72516e-05	0.14508	0.113304	0.0791255	0.0635154	0.148208	0.226154	0.062154	0.153859	0.0426201	0.29186	0.211292	0.0887634	0.0301067	0.0844841
Il10rb+/-	10		0.000141261	0.00108572	0.05644	0.390322	0.0118457	0.123087	0.0139849	0.00472614	0.107004	0.134491	0.0685413	0.0747906	0.0678211	0.143246	0.0432717	0.0349898
Il10rb+/-	12		0.0199103	0.0691928	0.21228	0.0327455	0.0608308	0.0119694	0.0886847	0.0367315	0.0282183	0.0994874	0.0665429	0.107111	0.105711	0.00168996	0.0843727	0.0447099
Il10rb+/-	19		8.85086e-05	0.0134526	0.133591	0.267521	0.104803	0.0928512	0.051429	0.0514847	0.0405754	0.254899	0.0832876	0.00404931	0.0814732	0.0209461	0.071613	0.0282465
Il10rb+/-	20		2.02e-05	1.24535e-05	0	0.00640633	0.187769	0.362806	0.0114081	0.00512729	0.118659	0.0276662	0.0991218	0.0923832	0.0348186	0.0142805	0.0381614	0.0156137
Il10rb+/-	21		0.0223737	0.0111434	0.0761597	0.00796707	0.0683342	0.275915	0.0367855	0.013335	0.0959311	0.0132674	0.0439641	0.0940937	0.0272921	0.0282321	0.1259	0.0666185
Il10rb+/-	30		0.000129844	0.000181835	0.086179	0.0182182	0.0640321	0.0193586	0.0225812	0.00561496	0.176242	0.184004	0.0971253	0.124329	0.00529219	0.0241271	0.103334	0.024129
Il10rb+/-	3					0.0651592	0.091591	0.0684638	0.147851	0.168254	0.115751	0.0845731	0.00198898	0.129436	0.00839298	0.000619181	0.0212525	0.0335756
		Control	0.00476359	0.010588	0.0788952	0.113504	0.0838652	0.111672	0.0853936	0.0802679	0.0885924	0.116476	0.0723638	0.121402	0.0711572	0.0614742	0.0628467	0.0722826
		Std Dev Control	0.00930616	0.0225972	0.0744565	0.126421	0.0451448	0.116881	0.0659073	0.102421	0.0446801	0.075115	0.0353081	0.0761358	0.0641071	0.0796278	0.0336716	0.0687634
Il10rb-/-	4		8.3409e-05	5.1727e-05	0.00809174	0.150601	0.10763	0.0237031	0.038718	0.0910356	0.0142931	0.0791218	0.042118	0.0817595	0.174303	0.0327767	0.026319	0.019997
Il10rb-/-	5		0	6.6912e-05	0.012825	0.0485553	0.0635818	0.0619937	0.113904	0.173246	0.0953054	0.00290312	0.0330796	0.111377	0.151232	0.0603767	0.0644616	0.0168814
Il10rb-/-	13		7.45168e-05	3.73895e-05	0.138767	0.138908	0.194828	0.0494199	0.0417972	0.0677569	0.0480992	0.0726479	0.06219	0.00011438	0.0535365	0.0668567	0.0352422	0.0354855
Il10rb-/-	15		0.0013216	0.0213652	0.0803436	0.213103	0.0329632	0.0200721	0.0660684	0.0344059	0.018222	0.107095	0.157231	0.000709774	0.015563	0.0080209	0.027621	0.0147633
Il10rb-/-	17		0.0329556	0.085208	0.166781	0.472983	0.0684777	0.00584439	0.114457	0.0230145	0.0228256	0.0934294	0.179879	0.0403113	0.182199	0.00796047	0.0871043	0.0190408
Il10rb-/-	18		5.83587e-05	6.6359e-05	0.154271	0.332937	0.0402369	0.0268988	0.0257128	0.0107148	0.022455	0.000563761	0.112862	0.0221527	0.0785928	0.0335863	0.0392029	0.00246676
Il10rb-/-	23		0.000194856	3.36944e-05	0.322791	0.300865	0.0460492	0.099618	0.0155051	0.0608476	0.319801	0.153506	0.118378	0.00442722	0.00010943	0.00110917	0.0607622	0.0266087
Il10rb-/-	27		9.00536e-05	0.0631873	8.80345e-05	0.000107629	0.000369344	0.194164	0.0372113	0.0717753	0.0589124	0.0379321	0.0898177	0.0264053	0.0612669	0.040551	0.0273188	0.000992816
Il10rb-/-	29		3.86817e-05	8.51965e-05	0.000377405	0.0794271	0.0168128	0.0254032	0.0840212	0.0704976	0.0265683	0.424732	0.0607484	0.00079689	0.00272083	0.00307885	0.00155888	0.00196194
Il10rb-/-	31		4.0662e-05	0.0430962	0.0446859	0.165621	0.0308283	0.0845807	0.0259813	0.00134557	0.0448892	0.00395678	0.0277756	0.0268933	0.0400034	0.046834	0.044559	0.00882403
Il10rb-/-	8				0.000705951	0.117739	0.0228123	0.16697	0.265239	0.0759861	0.091305	0.0032007	0.0813967	0.0718946	0.0879451	0.051123	0.0136281	0.02804
Il10rb-/-	14				0.0567972	0.0855159	0.0618871	0.0203908	0.043011	0.0078947	0.105325	0.0670506	0.075694	0.0129372	0.00148046	0.000269808	0.0183541	0.00958354
		KO	0.00348577	0.0213198	0.0822105	0.17553	0.0572063	0.0649216	0.0726355	0.0573767	0.0723335	0.0871783	0.0867641	0.0333149	0.070746	0.0293786	0.0371777	0.0153871
		Std Dev KO	0.0103622	0.0316605	0.0981056	0.134843	0.0517096	0.0611612	0.0691487	0.0475566	0.0842438	0.116956	0.0477805	0.0365116	0.066587	0.0244022	0.024007	0.0111123
			17	19	21	23	25	28	35	42	49	56	63	70	77	84	91	98
		Control	0.00476359	0.010588	0.0788952	0.113504	0.0838652	0.111672	0.0853936	0.0802679	0.0885924	0.116476	0.0723638	0.121402	0.0711572	0.0614742	0.0628467	0.0722826
		Std Dev Control	0.00930616	0.0225972	0.0744565	0.126421	0.0451448	0.116881	0.0659073	0.102421	0.0446801	0.075115	0.0353081	0.0761358	0.0641071	0.0796278	0.0336716	0.0687634
		KO	0.00348577	0.0213198	0.0822105	0.17553	0.0572063	0.0649216	0.0726355	0.0573767	0.0723335	0.0871783	0.0867641	0.0333149	0.070746	0.0293786	0.0371777	0.0153871
		Std Dev KO	0.0103622	0.0316605	0.0981056	0.134843	0.0517096	0.0611612	0.0691487	0.0475566	0.0842438	0.116956	0.0477805	0.0365116	0.066587	0.0244022	0.024007	0.0111123
